# Supplementary material for: Adverse Events of Prostacyclin Mimetics in Pulmonary Arterial Hypertension: A Systematic Review and Meta-Analysis
Source: PubMed Central journal article supplement (PMC6517977; doi:10.3390/jcm8040481), 2019-04-09
Supplement: jcm-08-00481-s001.pdf [file jcm-08-00481-s001.pdf]

## Dose Analysis Methods

Doses were analysed by multiplying the mean maximum dose at the end of trial with the dosing regime (per administration, per day). As studies were multinational, the international average adult weight was used to calculate dose per day for parenteral routes of administration. To account for differences in bioavailability, the daily doses were multiplied by the reported bioavailabilities for each drug and administration route (SI table 1). To assess pharmacological equivalence, drug doses were normalized to the iloprost dose reported in the McLaughlin et al. 2006 clinical trial and given 1 for both being the lowest molecular weight and the highest Ki at the IP receptor (4 nM). The estimated dose-ratio or all PMs with respect to iloprost is given in the last column

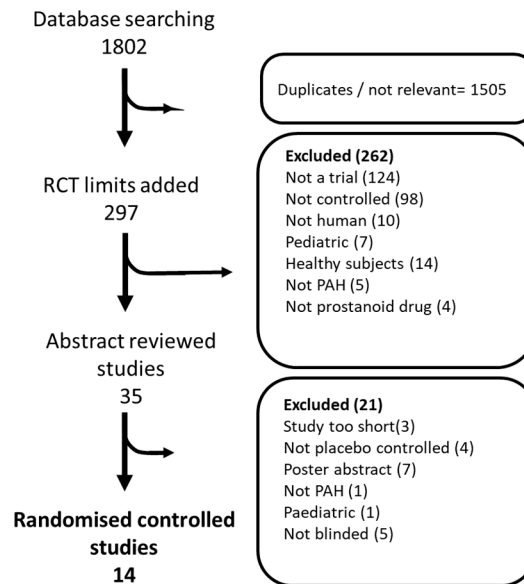

Figure S1. Literature search results flowchart.

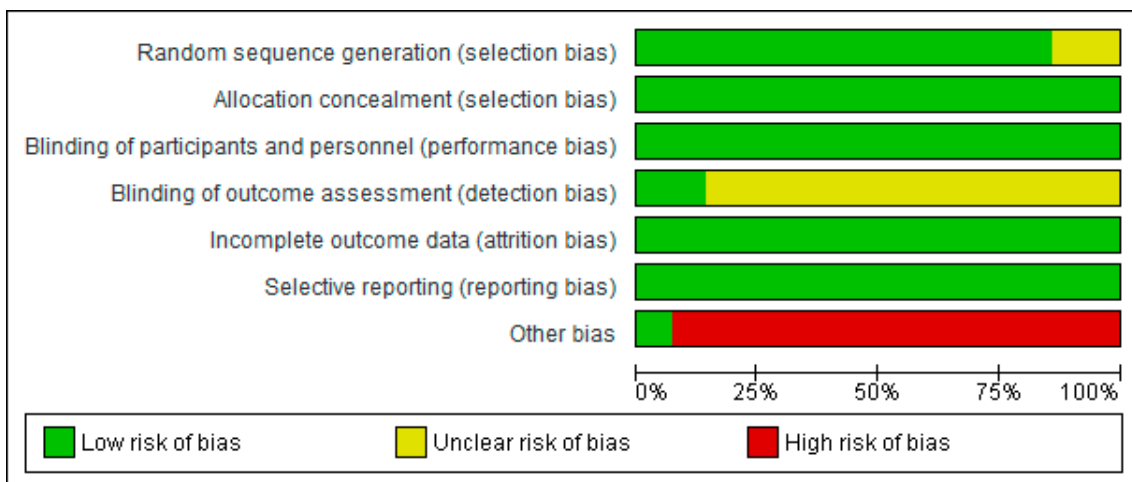

Figure S2. Assessment of bias.

|                        | Random sequence generation (selection bias) | Allocation concealment (selection bias) | Blinding of participants and personnel (performance bias) | Blinding of outcome assessment (detection bias) | Incomplete outcome data (attrition bias) | Selective reporting (reporting bias) | Other bias |
|------------------------|---------------------------------------------|-----------------------------------------|-----------------------------------------------------------|-------------------------------------------------|------------------------------------------|--------------------------------------|------------|
| Barst et al. 2003      | +                                           | +                                       | +                                                         | +                                               | +                                        | +                                    | -          |
| Galie et al. 2002      | +                                           | +                                       | +                                                         | ?                                               | +                                        | +                                    | -          |
| Hiremath et al. 2010   | +                                           | +                                       | +                                                         | ?                                               | +                                        | +                                    | -          |
| Jing et al. 2013       | +                                           | +                                       | +                                                         | ?                                               | +                                        | +                                    | -          |
| McLaughlin et al. 2003 | +                                           | +                                       | +                                                         | ?                                               | +                                        | +                                    | -          |
| McLaughlin et al. 2006 | +                                           | +                                       | +                                                         | ?                                               | +                                        | +                                    | -          |
| Mclaughlin et al. 2010 | +                                           | +                                       | +                                                         | ?                                               | +                                        | +                                    | -          |
| Olschewski et al. 2002 | ?                                           | +                                       | +                                                         | ?                                               | +                                        | +                                    | -          |
| Rubenfire et al. 2007  | +                                           | +                                       | +                                                         | ?                                               | +                                        | +                                    | +          |
| Simonneau et al. 2002  | +                                           | +                                       | +                                                         | ?                                               | +                                        | +                                    | -          |
| Simonneau et al. 2012  | +                                           | +                                       | +                                                         | ?                                               | +                                        | +                                    | -          |
| Sitbon et al. 2015     | ?                                           | +                                       | +                                                         | +                                               | +                                        | +                                    | -          |
| Tapson et al. 2012     | +                                           | +                                       | +                                                         | ?                                               | +                                        | +                                    | -          |
| Tapson et al. 2013     | +                                           | +                                       | +                                                         | ?                                               | +                                        | +                                    | -          |

Figure S3. Assessment of study quality.

**Table S1.** Dosing information for each trial.

| Trial                   | Administration Route | PM           | Dose per Administration | Daily Dosing Regime | Bio-Availability [ref] | Daily Dose (mg)    | Relative Dose Corrected for IP Potency /mg |
|-------------------------|----------------------|--------------|-------------------------|---------------------|------------------------|--------------------|--------------------------------------------|
| Simonneau et al., 2002  | Subcutaneous         | Treprostinil | 9.3 ng/kg/min           | Continuous          | 1 [1]                  | 0.830 <sup>†</sup> | 0.76                                       |
| McLaughlin et al., 2003 | Subcutaneous         | Treprostinil | 13 ng/kg/min            | Continuous          | 1 [1]                  | 1.161 <sup>†</sup> | 1.06                                       |
| Rubens et al., 2007     | Subcutaneous         | Treprostinil | 32.2 ng/kg/min          | Continuous          | 1 [1]                  | 2.875 <sup>†</sup> | 2.62                                       |
| Hiremath et al., 2010   | Intravenous          | Treprostinil | 72 ng/kg/min            | Continuous          | 1 [1]                  | 4.769 <sup>†</sup> | 4.34                                       |
| McLaughlin et al., 2010 | Inhaled              | Treprostinil | 50 µg                   | 9 inhalations QD    | 0.78 [2]               | 1.404              | 1.28                                       |
| Tapson et al., 2012     | Oral                 | Treprostinil | -                       | -                   | -                      | -                  | -                                          |
| Jing et al., 2013       | Oral                 | Treprostinil | 3.4 mg                  | BD                  | 0.17 [3]               | 1.156              | 1.05                                       |
| Tapson et al., 2013     | Oral                 | Treprostinil | 3.1 mg                  | BD                  | 0.17 [3]               | 1.054              | 0.96                                       |
| Simonneau et al., 2012  | Oral                 | Selexipag    | 583 µg                  | BD                  | 0.49 [4]               | 0.571              | 0.69                                       |
| Sitbon et al., 2015     | Oral                 | Selexipag    | 950.4 µg                | BD                  | 0.49 [4]               | 0.931              | 1.13                                       |
| Galie et al., 2002      | Oral                 | Beraprost    | 80 µg                   | QD                  | 0.6 [5]                | 0.192              | 0.14                                       |
| Barst et al., 2003      | Oral                 | Beraprost    | 71 µg                   | QD                  | 0.6 [5]                | 0.170              | 0.12                                       |
| McLaughlin et al., 2006 | Inhaled              | Iloprost     | 26.8 µg                 | 5.6 inhalations *   | 0.8 [6]                | 0.120              | 1.00                                       |
| Olschewski et al., 2002 | Inhaled              | Iloprost     | 4.8 µg                  | 7.5 inhalations *   | 0.8 [6]                | 0.029              | 0.24                                       |

PM = prostacyclin mimetic; BD = two dosings daily; QD = four dosing; \* = Mean number of inhalations achieved during trial; † = weight based on international average (62 kg). Daily dose is calculated as described in the methods, accounting for mean dose of administration, number of dosings per day, bioavailability, molecular weight and potency at the IP receptor. Mw treprostinil, selexipag, beraprost and iloprost = 412.5, 496.6, 420.5, 360.5 g/mol, respectively and for potency, Ki 4, 20, 32,38 nM, respectively.

**Table S2.** Table of adverse events (AE) as meta-analysed by drug type.

| AE                | Overall OR                              | Treprostinil OR                         | Beraprost OR                            | Iloprost OR                            | Selexipag OR                          |
|-------------------|-----------------------------------------|-----------------------------------------|-----------------------------------------|----------------------------------------|---------------------------------------|
|                   | (CI)<br><i>I<sup>2</sup>, p Value</i>   | (CI)<br><i>I<sup>2</sup>, p Value</i>   | (CI)<br><i>I<sup>2</sup>, p Value</i>   | (CI)<br><i>I<sup>2</sup>, p Value</i>  | (CI)<br><i>I<sup>2</sup>, p Value</i> |
| Site pain         | <b>8.7</b><br>(1.6, 45.9)<br>79%, 0.003 | <b>8.7</b><br>(1.6, 45.9)<br>79%, 0.003 | -                                       | -                                      | -                                     |
| Flushing          | <b>4.0</b><br>(3.0, 5.3)<br>19%, 0.259  | <b>4.4</b><br>(2.7, 7.1)<br>30%, 0.02   | <b>5.3</b><br>(2.3, 12.1)<br>49%, 0.16  | <b>3.7</b><br>(1.8, 7.4)<br>0%, 0.886  | <b>2.7</b><br>(1.7, 4.1)<br>0%, 0.675 |
| Jaw Pain          | <b>4.6</b><br>(3.6, 5.8)<br>0%, 0.571   | <b>4.0</b><br>(2.9, 5.6)<br>0%, 0.421   | <b>8.7</b><br>(2.0, 37.2)<br>50%, 0.159 | <b>4.2</b><br>(1.6, 10.8)<br>0%, 0.885 | <b>5.0</b><br>(3.4, 7.3)<br>0% 0.356  |
| Headache          | <b>3.6</b><br>(2.4, 5.4)<br>82%, <0.001 | <b>3.3</b><br>(1.6, 6.8)<br>88%, <0.001 | NS<br>87%, 0.006                        | <b>2.4</b><br>(1.0, 5.7)<br>49%, 0.161 | <b>3.9</b><br>(3.0, 5.0)<br>0%, 0.406 |
| Pain in extremity | <b>2.7</b><br>(1.7, 3.5)<br>0%, 0.480   | <b>3.3</b><br>(2.2, 4.9)<br>0%, 0.421   | -                                       | NS<br>-, -                             | <b>2.4</b><br>(1.7, 3.5)<br>0%, 0.354 |
| Diarrhoea         | <b>2.6</b><br>(2.0, 3.4)<br>46%, 0.039  | <b>2.7</b><br>(1.9, 3.9)<br>47%, 0.079  | <b>3.1</b><br>(1.4, 7.3)<br>36%, 0.213  | NS<br>-, -                             | <b>3.1</b><br>(2.4, 4.1)<br>0%, 0.698 |
| Vomiting          | <b>2.5</b><br>(1.4, 4.7)<br>79%, <0.00  | <b>2.6</b><br>(1.1, 6.1)<br>79%, <0.001 | -                                       | -                                      | <b>2.4</b><br>(1.7, 3.4)<br>-, -      |
| Arthralgia        | <b>1.5</b><br>(1.1, 2.2)<br>0%, 0.788   | NS<br>0%, 0.628                         | -                                       | -                                      | NS<br>-, -                            |
| Nausea            | <b>2.2</b><br>(1.7, 2.8)<br>41%, 0.060  | <b>2.0</b><br>(1.3, 3.0)<br>63%, 0.012  | <b>3.4</b><br>(1.7, 6.7)<br>0%, 0.451   | NS<br>0%, 0.588                        | <b>2.2</b><br>(1.7, 2.9)<br>0%, 0.386 |
| Peripheral Oedema | NS<br>59%, 0.024                        | <b>2.1</b><br>(1.2, 3.8)<br>18%, 0.297  | NS<br>-, -                              | NS<br>0%, 0.889                        | NS<br>-, -                            |
| Fatigue           | NS<br>50%, 0.062                        | NS<br>0%, 0.726                         | <b>3.6</b><br>(1.1, 11.8)<br>-, -       | NS<br>-, -                             | NS<br>-, -                            |
| Cough             | NS<br>68%, 0.005                        | NS<br>68%, 0.042                        | -                                       | <b>2.0</b><br>(1.2, 3.5)<br>0%, 0.042  | NS<br>0%, 0.376                       |
| URTI              | NS<br>6%, 0.382                         | NS<br>0%, 0.486                         | <b>0.5</b><br>(0.2, 1.0)<br>-, -        | NS<br>-, -                             | NS<br>0%, 0.726                       |
| Dyspnea           | NS<br>57%, 0.030                        | NS<br>59%, 0.046                        | -                                       | NS<br>-, -                             | <b>0.7</b><br>(0.5, 1.0)<br>-, -      |

OR = odds ratio; CI = confidence interval; UTRI = upper respiratory tract infection; NS = Not significant result (determined by confidence interval crossing 1).

**Table S3.** Odds ratios (OR) of adverse events (AE) as meta-analysed by route of administration.

| AE                | Overall OR                                     | Subcutaneous OR                                | Intravenous OR                                 | Inhaled OR                                     | Oral OR                                        |
|-------------------|------------------------------------------------|------------------------------------------------|------------------------------------------------|------------------------------------------------|------------------------------------------------|
|                   | (CI)<br><i>I</i> <sup>2</sup> , <i>p</i> Value | (CI)<br><i>I</i> <sup>2</sup> , <i>p</i> Value | (CI)<br><i>I</i> <sup>2</sup> , <i>p</i> Value | (CI)<br><i>I</i> <sup>2</sup> , <i>p</i> Value | (CI)<br><i>I</i> <sup>2</sup> , <i>p</i> Value |
| Site pain         | <b>8.7</b><br>(1.6, 45.9)<br>79%, 0.003        | <b>17.5</b><br>(11.1, 27.1)<br>0%, 0.915       | NS<br>- , -                                    | -                                              | -                                              |
| Flushing          | <b>4.0</b><br>(3.0, 5.3)<br>19%, 0.259         | NS<br>- , -                                    | -                                              | <b>4.7</b><br>(2.0, 11.1)<br>26%, 0.26         | <b>4.0</b><br>(2.9, 5.5)<br>27%, 0.226         |
| Jaw Pain          | <b>4.6</b><br>(3.6, 5.8)<br>0%, 0.571          | <b>3.1</b><br>(1.6, 6.2)<br>0%, 0.929          | NS<br>- , -                                    | <b>2.7</b><br>(1.2, 6.0)<br>14%, 0.313         | <b>5.1</b><br>(4.0, 6.7)<br>0%, 0.700          |
| Headache          | <b>3.6</b><br>(2.4, 5.4)<br>82%, <0.001        | NS<br>59%, 0.088                               | <b>6.0</b><br>(1.1, 31.5)<br>- , -             | <b>2.4</b><br>(1.0, 5.7)<br>49%, 0.161         | <b>5.4</b><br>(3.5, 8.2)<br>73%, 0.001         |
| Pain in extremity | <b>2.7</b><br>(1.7, 3.5)<br>0%, 0.480          | NS<br>- , -                                    | <b>13.0</b><br>(1.5, 112.3)<br>- , -           | NS<br>- , -                                    | <b>2.7</b><br>(2.1, 3.6)<br>0%, 0.418          |
| Diarrhoea         | <b>2.6</b><br>(2.0, 3.4)<br>46%, 0.039         | <b>1.8</b><br>(1.2, 2.9)<br>0%, 0.915          | NS<br>- , -                                    | NS<br>0%, 0.474                                | <b>3.3</b><br>(2.7, 4.0)<br>0%, 0.659          |
| Vomiting          | <b>2.5</b><br>(1.4, 4.7)<br>79%, <0.001        | NS<br>12%, 0.322                               | <b>6.0</b><br>(1.1, 31.5)<br>- , -             | -                                              | <b>2.5</b><br>(1.4, 4.7)<br>85%, <0.001        |
| Arthralgia        | <b>1.5</b><br>(1.1, 2.2)<br>0%, 0.788          | -                                              | -                                              | -                                              | <b>1.5</b><br>(1.1, 2.2)<br>0%, 0.788          |
| Nausea            | <b>2.2</b><br>(1.7, 2.8)<br>41%, 0.060         | NS<br>65%, 0.091                               | NS<br>- , -                                    | <b>1.7</b><br>(1.0, 2.9)<br>0%, 0.766          | <b>2.6</b><br>(2.2, 3.2)<br>0%, 0.433          |
| Peripheral oedema | NS<br>59%, 0.024                               | <b>3.8</b><br>(1.5, 9.6)<br>- , -              | -                                              | NS<br>0%, 0.889                                | NS<br>45%, 0.141                               |
| Cough             | NS<br>68%, 0.005                               | -                                              | NS<br>- , -                                    | <b>2.4</b><br>(1.6, 3.5)<br>0%, 0.537          | NS<br>0%, 0.668                                |

CI = confidence interval; NS = Not significant result (determined by confidence interval crossing 1).

**Table S4.** Odds ratios of adverse events as meta-analysed by the concomitant therapy given during the length of the trial.

| AE                | Overall OR<br>(CI)<br><i>I<sup>2</sup>, p Value</i> | No Background therapy OR<br>(CI)<br><i>I<sup>2</sup>, p Value</i> | Background therapy OR<br>(CI)<br><i>I<sup>2</sup>, p Value</i> |
|-------------------|-----------------------------------------------------|-------------------------------------------------------------------|----------------------------------------------------------------|
| Site pain         | <b>8.7</b><br>(1.6, 45.9)<br>79%, 0.003             | <b>8.7</b><br>(1.6, 45.9)<br>79%, 0.003                           | -                                                              |
| Flushing          | <b>4.0</b><br>(3.0, 5.3)<br>19%, 0.259              | <b>3.8</b><br>(2.4, 6.2)<br>21%, 0.281                            | <b>4.1</b><br>(2.8, 6.1)<br>32%, 0.195                         |
| Jaw Pain          | <b>4.6</b><br>(3.6, 5.8)<br>0%, 0.571               | <b>4.3</b><br>(2.8, 6.6)<br>0%, 0.588                             | <b>4.5</b><br>(3.3, 6.2)<br>14%, 0.326                         |
| Headache          | <b>3.6</b><br>(2.4, 5.4)<br>82%, <0.001             | <b>2.8</b><br>(1.3, 5.8)<br>84%, <0.001                           | <b>5.2</b><br>(3.2, 8.3)<br>69%, 0.012                         |
| Pain in extremity | <b>2.7</b><br>(1.7, 3.5)<br>0%, 0.480               | <b>2.9</b><br>(1.0, 8.7)<br>25%, 0.265                            | <b>2.7</b><br>(2.1, 3.6)<br>0%, 0.424                          |
| Diarrhoea         | <b>2.6</b><br>(2.0, 3.4)<br>46%, 0.039              | <b>2.1</b><br>(1.4, 3.0)<br>26%, 0.228                            | <b>3.2</b><br>(2.5, 4.3)<br>28%, 0.237                         |
| Vomiting          | <b>2.5</b><br>(1.4, 4.7)<br>79%, <0.001             | NS<br>33%, 0.203                                                  | <b>3.6</b><br>(1.6, 8.2)<br>86%, 0.001                         |
| Arthralgia        | <b>1.5</b><br>(1.1, 2.2)<br>0%, 0.788               | NS<br>-, -                                                        | <b>1.5</b><br>(1.0, 2.1)<br>0%, 0.837                          |
| Nausea            | <b>2.2</b><br>(1.7, 2.8)<br>41%, 0.060              | <b>1.8</b><br>(1.1, 2.7)<br>38%, 0.140                            | <b>2.6</b><br>(2.0, 3.3)<br>18%, 0.296                         |
| Peripheral oedema | NS<br>59%, 0.024                                    | NS<br>53%, 0.093                                                  | NS<br>46%, 0.155                                               |
| Cough             | NS<br>68%, 0.005                                    | NS<br>21%, 0.282                                                  | NS<br>81%, 0.001                                               |

CI = confidence interval; NS = Not significant result (determined by confidence interval crossing 1).

**Table S5.** Odds ratio (OR) of adverse events (AE) as meta-analysed by the treatment received in the one month up to the trial date.

| AE                | Overall OR<br>(CI)<br><i>P, p Value</i> | Conventional therapy OR<br>(CI)<br><i>P, p Value</i> | Epoprostenol therapy OR<br>(CI)<br><i>P, p Value</i> | ERA / PDE-5i therapy OR<br>(CI)<br><i>P, p Value</i> |
|-------------------|-----------------------------------------|------------------------------------------------------|------------------------------------------------------|------------------------------------------------------|
| Site pain         | 8.7<br>(1.6, 45.9)<br>79%, 0.003        | NS<br><br>86%, 0.001                                 | 21.7<br>(1.8, 260.6)<br>-, -                         | -                                                    |
| Flushing          | 4.0<br>(3.0, 5.3)<br>19%, 0.259         | 4.2<br>(2.6, 6.6)<br>12%, 0.335                      | NS<br>-, -                                           | 4.1<br>(2.8, 6.1)<br>32%, 0.195                      |
| Jaw Pain          | 4.6<br>(3.6, 5.8)<br>0%, 0.571          | 4.3<br>(2.8, 6.8)<br>0%, 0.475                       | NS<br>-, -                                           | 4.5<br>(3.3, 6.2)<br>14%, 0.326                      |
| Headache          | 3.6<br>(2.4, 5.4)<br>82%, <0.001        | 3.3<br>(1.6, 7.0)<br>85%, <0.001                     | NS<br>-, -                                           | 5.2<br>(3.2, 8.3)<br>69%, 0.012                      |
| Pain in extremity | 2.7<br>(1.7, 3.5)<br>0%, 0.480          | NS<br><br>62%, 0.107                                 | NS<br>-, -                                           | 2.7<br>(2.1, 3.6)<br>0%, 0.424                       |
| Diarrhoea         | 2.6<br>(2.0, 3.4)<br>46%, 0.039         | 2.1<br>(1.2, 2.9)<br>38%, 0.151                      | NS<br>-, -                                           | 3.2<br>(2.5, 4.3)<br>28%, 0.237                      |
| Vomiting          | 2.5<br>(1.4, 4.7)<br>79%, <0.001        | NS<br><br>46%, 0.137                                 | NS<br>-, -                                           | 3.6<br>(1.6, 4.7)<br>86%, 0.001                      |
| Arthralgia        | 1.5<br>(1.1, 2.2)<br>0%, 0.788          | NS<br><br>-, -                                       | -                                                    | 1.5<br>(1.0, 2.1)<br>0%, 0.837                       |
| Nausea            | 2.2<br>(1.7, 2.8)<br>41%, 0.060         | 1.8<br>(1.3, 2.6)<br>13.1%, 0.331                    | NS<br>-, -                                           | 2.6<br>(2.0, 3.3)<br>18%, 0.269                      |
| Peripheral oedema | NS<br><br>59%, 0.024                    | NS<br><br>53%, 0.093                                 | -                                                    | NS<br><br>46%, 0.155                                 |
| Cough             | NS<br><br>68%, 0.005                    | NS<br><br>21%, 0.282                                 | -                                                    | NS<br><br>81%, 0.001                                 |

CI = confidence interval; NS = Not significant result (determined by confidence interval crossing 1).

**Table S6.** Weighted mean difference (WMD) of outcomes as meta-analysed by drug type.

|                                     | Overall WMD<br>(CI)<br><i>I<sup>2</sup>, p Value</i> | Treprostinil WMD<br>(CI)<br><i>I<sup>2</sup>, p Value</i> | Beraprost WMD<br>(CI)<br><i>I<sup>2</sup>, p Value</i> | Iloprost WMD<br>(CI)<br><i>I<sup>2</sup>, p Value</i> | Selexipag WMD<br>(CI)<br><i>I<sup>2</sup>, p Value</i> |
|-------------------------------------|------------------------------------------------------|-----------------------------------------------------------|--------------------------------------------------------|-------------------------------------------------------|--------------------------------------------------------|
| 6MWD                                | <b>16.3</b><br>(13.0, 19.7)<br>90%, <0.001           | <b>15.9</b><br>(10.0, 21.8)<br>94%, <0.001                | <b>22.8</b><br>(17.0, 28.6)<br>0%, 0.331               | <b>28.5</b><br>(11.1, 46.0)<br>0%, 0.331              | <b>13.0</b><br>(12.6, 13.4)<br>0%, 0.556               |
| Mean Pulmonary arterial pressure    | <b>-1.94</b><br>(-3.5, -0.3)<br>59%, 0.024           | <b>NS</b><br>60%, 0.114                                   | <b>NS</b><br>0%, 0.705                                 | <b>NS</b><br>72%, 0.058                               | <b>NS</b><br>-, -                                      |
| Pulmonary vascular resistance index | <b>-3.1</b><br>(-5.3, -1.0)<br>100%, <0.001          | <b>-4.7</b><br>(-4.8, -4.6)<br>0%, 0.682                  | <b>-1.5</b><br>(-1.8, -1.3)<br>0%, 0.465               | <b>-</b>                                              | <b>-</b>                                               |
| Mixed venous saturation             | <b>3.3</b><br>(2.9, 3.7)<br>3%, 0.390                | <b>NS</b><br>57%, 0.129                                   | <b>NS</b><br>-, -                                      | <b>2.1</b><br>(0.1, 4.1)<br>-, -                      | <b>NS</b><br>-, -                                      |
| Right arterial pressure             | <b>NS</b><br>83%, <0.001                             | <b>NS</b><br>76%, 0.040                                   | <b>NS</b><br>0%, 1.000                                 | <b>NS</b><br>-, -                                     | <b>3.2</b><br>(1.1, 5.3)<br>-, -                       |
| Heart rate                          | <b>-0.6</b><br>(-2.4, 1.2)<br>46%, 0.118             | <b>0.3</b><br>(0.2, 0.4)<br>-, -                          | <b>NS</b><br>-, -                                      | <b>NS</b><br>53%, 0.145                               | <b>NS</b><br>-, -                                      |
| Cardiac index                       | <b>0.3</b><br>(0.1, 0.4)<br>-, -                     | <b>0.2</b><br>(0.2, 0.2)<br>0%, 0.437                     | <b>0.2</b><br>(0.0, 0.3)<br>0%, 0.400                  | <b>-</b>                                              | <b>0.5</b><br>(0.3, 0.7)<br>-, -                       |

CI = confidence interval; NS = Not significant result (determined by confidence interval crossing 1); 6MWD = six-minute walk distance.



**Table S7.** Standardised mean difference (SMD) of outcomes as meta-analysed by drug type.

|                                     | <b>Overall SMD<br/>(CI)<br/><i>I</i><sup>2</sup>, <i>p</i> Value</b> | <b>Treprostinil SMD<br/>(CI)<br/><i>I</i><sup>2</sup>, <i>p</i> Value</b> | <b>Beraprost SMD<br/>(CI)<br/><i>I</i><sup>2</sup>, <i>p</i> Value</b> | <b>Iloprost SMD<br/>(CI)<br/><i>I</i><sup>2</sup>, <i>p</i> Value</b> | <b>Selexipag SMD<br/>(CI)<br/><i>I</i><sup>2</sup>, <i>p</i> Value</b> |
|-------------------------------------|----------------------------------------------------------------------|---------------------------------------------------------------------------|------------------------------------------------------------------------|-----------------------------------------------------------------------|------------------------------------------------------------------------|
| 6MWD                                | <b>1.2</b><br>(0.6, 1.8)<br>98%, <0.001                              | <b>1.2</b><br>(0.9, 1.6)<br>90%, <0.001                                   | <b>0.9</b><br>(0.0, 1.7)<br>90%, 0.002                                 | <b>0.4</b><br>(0.2, 0.7)<br>0%, 0.690                                 | NS<br><br>98%, <0.001                                                  |
| Borg Dyspnea score                  | <b>-0.3</b><br>(-0.4, -0.1)<br>36%, 0.133                            | NS<br><br>60%, 0.040                                                      | <b>-0.4</b><br>(-0.6, -0.1)<br>0%, 0.356                               | NS<br><br>-, -                                                        | NS<br><br>-, -                                                         |
| Quality of Life Score               | <b>0.2</b><br>(-0.1, 0.3)<br>0%, 0.391                               | NS<br><br>62%, 0.106                                                      | NS<br><br>-, -                                                         | NS<br><br>-, -                                                        | -<br><br>-                                                             |
| Mean pulmonary arterial pressure    | NS<br><br>99%, <0.001                                                | NS<br><br>99%, <0.001                                                     | NS<br><br>0%, 0.675                                                    | NS<br><br>71%, 0.065                                                  | NS<br><br>-, -                                                         |
| Pulmonary vascular resistance index | <b>-3.6</b><br>(-6.8, -0.4)<br>99%, <0.001                           | <b>-5.5</b><br>(-10.1, -0.9)<br>98%, <0.001                               | <b>-1.8</b><br>(-2.2, -1.5)<br>5%, 0.306                               | -<br><br>-                                                            | -<br><br>-                                                             |
| Mixed venous saturation             | NS<br><br>99%, <0.001                                                | NS<br><br>99%, <0.001                                                     | NS<br><br>-, -                                                         | <b>0.3</b><br>(0.0, 0.6)<br>-, -                                      | NS<br><br>-, -                                                         |
| Right arterial pressure             | NS<br><br>99%, <0.001                                                | NS<br><br>99%, <0.001                                                     | NS<br><br>0%, 0.875                                                    | NS<br><br>-, -                                                        | <b>1.0</b><br>(0.2, 1.7)<br>-, -                                       |
| Heart rate                          | NS<br><br>77%, 0.001                                                 | <b>0.40</b><br>(0.22, 0.58)<br>-, -                                       | NS<br><br>-, -                                                         | NS<br><br>55%, 0.136                                                  | NS<br><br>-, -                                                         |
| Cardiac index                       | NS<br><br>99%, <0.001                                                | NS<br><br>99%, <0.001                                                     | NS<br><br>49%, 0.161                                                   | -<br><br>-                                                            | <b>1.1</b><br>(0.4, 1.9)<br>-, -                                       |

CI = confidence interval; NS = Not significant result (determined by confidence interval crossing 1); 6MWD = six-minute walk distance.

**Table S8.** Standardised mean difference (SMD) of outcomes as meta-analysed by route of administration.

|                                     | <b>Overall SMD<br/>(CI)<br/><i>I</i><sup>2</sup>, <i>p</i> Value</b> | <b>Subcutaneous SMD<br/>(CI)<br/><i>I</i><sup>2</sup>, <i>p</i> Value</b> | <b>Intravenous SMD<br/>(CI)<br/><i>I</i><sup>2</sup>, <i>p</i> Value</b> | <b>Inhaled SMD<br/>(CI)<br/><i>I</i><sup>2</sup>, <i>p</i> Value</b> | <b>Oral SMD<br/>(CI)<br/><i>I</i><sup>2</sup>, <i>p</i> Value</b> |
|-------------------------------------|----------------------------------------------------------------------|---------------------------------------------------------------------------|--------------------------------------------------------------------------|----------------------------------------------------------------------|-------------------------------------------------------------------|
| 6MWD                                | <b>1.2</b><br>(0.6, 1.8)<br>98%, <0.001                              | <b>1.1</b><br>(0.6, 1.7)<br>47%, 0.152                                    | <b>0.7</b><br>(0.1, 1.4)<br>-, -                                         | NS<br><br>96%, <0.001                                                | <b>1.4</b><br>(0.4, 2.4)<br>99%, <0.001                           |
| Borg Dyspnea score                  | <b>-0.3</b><br>(-0.4, -0.1)<br>36%, 0.133                            | NS<br><br>17%, 0.300                                                      | <b>-1.0</b><br>(-1.6, -0.3)<br>-, -                                      | NS<br><br>41%, 0.193                                                 | <b>-0.3</b><br>(-0.6, -0.1)<br>0%, 0.459                          |
| Quality of Life Score               | <b>0.2</b><br>(0.1, 0.3)<br>0%, 0.391                                | NS<br><br>-, -                                                            | -<br><br>-                                                               | <b>0.3</b><br>(0.1, 0.6)<br>9%, 0.293                                | NS<br><br>-, -                                                    |
| Mean pulmonary arterial pressure    | NS<br><br>99%, <0.001                                                | NS<br><br>99%, <0.001                                                     | -<br><br>-                                                               | <b>NS</b><br><br>71%, 0.065                                          | <b>-0.26</b><br>(-0.53, 0.00)<br>0%, 0.502                        |
| Pulmonary vascular resistance index | <b>-3.6</b><br>(-6.8, -0.4)<br>99%, <0.001                           | <b>-5.5</b><br>(-10.1, -0.9)<br>98%, <0.001                               | -<br><br>-                                                               | -<br><br>-                                                           | <b>-1.8</b><br>(-2.2, -1.5)<br>5%, 0.306                          |
| Mixed venous saturation             | NS<br><br>99%, <0.001                                                | NS<br><br>99%, <0.001                                                     | -<br><br>-                                                               | <b>0.3</b><br>(0.0, 0.6)<br>-, -                                     | NS<br><br>0%, 0.588                                               |
| Right arterial pressure             | NS<br><br>99%, <0.001                                                | NS<br><br>99%, <0.001                                                     | -<br><br>-                                                               | NS<br><br>-, -                                                       | NS<br><br>99%, 0.027                                              |
| Heart rate                          | NS<br><br>77%, 0.001                                                 | <b>0.4</b><br>(0.2, 0.6)<br>-, -                                          | -<br><br>-                                                               | NS<br><br>55%, 0.136                                                 | NS<br><br>57%, 0.126                                              |
| Cardiac index                       | NS<br><br>99%, <0.001                                                | NS<br><br>99%, <0.001                                                     | -<br><br>-                                                               | -<br><br>-                                                           | NS<br><br>66%, 0.052                                              |

CI = confidence interval; NS = Not significant result (determined by confidence interval crossing 1); 6MWD = six-minute walk distance.

**Table S9.** Weighted mean difference (WMD) of outcomes as meta-analysed by route of administration.

|                                     | <b>Overall WMD<br/>(CI)<br/><i>I</i><sup>2</sup>, <i>p</i> Value</b> | <b>Subcutaneous WMD<br/>(CI)<br/><i>I</i><sup>2</sup>, <i>p</i> Value</b> | <b>Intravenous WMD<br/>(CI)<br/><i>I</i><sup>2</sup>, <i>p</i> Value</b> | <b>Inhaled WMD<br/>(CI)<br/><i>I</i><sup>2</sup>, <i>p</i> Value</b> | <b>Oral WMD<br/>(CI)<br/><i>I</i><sup>2</sup>, <i>p</i> Value</b> |
|-------------------------------------|----------------------------------------------------------------------|---------------------------------------------------------------------------|--------------------------------------------------------------------------|----------------------------------------------------------------------|-------------------------------------------------------------------|
| 6MWD                                | <b>16.3</b><br>(13.0, 19.7)<br>90%, <0.001                           | NS<br><br>87%, <0.001                                                     | <b>93.0</b><br>(8.3, 178)<br>-, -                                        | <b>19.5</b><br>(15.5, 23.5)<br>3%, 0.356                             | <b>15.3</b><br>(11.1, 19.5)<br>93%, <0.001                        |
| Mean pulmonary arterial pressure    | <b>-1.94</b><br>(-3.5, -0.3)<br>59%, 0.024                           | NS<br><br>60%, 0.114                                                      | -                                                                        | NS<br><br>72%, 0.058                                                 | NS<br><br>0%, 0.460                                               |
| Pulmonary vascular resistance index | <b>-3.1</b><br>(-5.3, -1.0)<br>100%, <0.001                          | <b>-4.7</b><br>(-4.8, -4.6)<br>0%, 0.682                                  | -                                                                        | -                                                                    | <b>-1.5</b><br>(-1.8, -1.3)<br>0%, 0.465                          |
| Mixed venous saturation             | <b>3.3</b><br>(2.9, 3.7)<br>3%, 0.390                                | NS<br><br>99%, <0.001                                                     | -                                                                        | <b>0.3</b><br>(0.0, 0.6)<br>-, -                                     | NS<br><br>99%, <0.001                                             |
| Right arterial pressure             | NS<br><br>83%, <0.001                                                | NS<br><br>76%, 0.040                                                      | -                                                                        | NS<br><br>-, -                                                       | NS<br><br>75%, 0.018                                              |
| Heart rate                          | NS<br><br>46%, 0.118                                                 | <b>0.3</b><br>(0.2, 0.4)<br>-, -                                          | -                                                                        | NS<br><br>53%, 0.145                                                 | NS<br><br>62%, 0.107                                              |
| Cardiac index                       | <b>0.3</b><br>(0.1, 0.4)<br>60%, 0.041                               | <b>0.2</b><br>(0.2, 0.2)<br>0%, 0.437                                     | -                                                                        | -                                                                    | <b>0.3</b><br>(0.0, 0.5)<br>70%, 0.036                            |

CI = confidence interval; NS = Not significant result (determined by confidence interval crossing 1); 6MWD = six-minute walk distance.

**Table S10.** Odds ratios (OR) of outcomes as meta-analysed by drug type.

|                                    | <b>Overall OR<br/>(CI)<br/><i>I</i><sup>2</sup>, <i>p</i> Value</b> | <b>Treprostinil OR<br/>(CI)<br/><i>I</i><sup>2</sup>, <i>p</i> Value</b> | <b>Beraprost OR<br/>(CI)<br/><i>I</i><sup>2</sup>, <i>p</i> Value</b> | <b>Iloprost OR<br/>(CI)<br/><i>I</i><sup>2</sup>, <i>p</i> Value</b> | <b>Selexipag OR<br/>(CI)<br/><i>I</i><sup>2</sup>, <i>p</i> Value</b> |
|------------------------------------|---------------------------------------------------------------------|--------------------------------------------------------------------------|-----------------------------------------------------------------------|----------------------------------------------------------------------|-----------------------------------------------------------------------|
| Discontinuation from adverse event | NS<br>61%, 0.009                                                    | NS<br>74%, 0.002                                                         | NS<br>-, -                                                            | NS<br>-, -                                                           | 2.2<br>(1.5, 3.3)<br>-, -                                             |
| Clinical deterioration             | 0.4<br>(0.2, 0.8)<br>47%, 0.080                                     | NS<br>65%, 0.036                                                         | -                                                                     | NS<br>-, -                                                           | 0.3<br>(0.2, 0.5)<br>0%, 0.440                                        |
| Fatalities                         | NS<br>14%, 0.319                                                    | NS<br>0%, 0.511                                                          | NS<br>-, -                                                            | NS<br>-, -                                                           | NS<br>-, -                                                            |
| Lung transplant                    | NS<br>0%, 0.870                                                     | NS<br>0%, 0.610                                                          | -                                                                     | -                                                                    | NS<br>-, -                                                            |
| Rescue therapy                     | NS<br>0%, 0.695                                                     | NS<br>0%, 0.488                                                          | NS<br>-, -                                                            | NS<br>-, -                                                           | NS<br>-, -                                                            |
| Right ventricular heart failure    | NS<br>0%, 0.485                                                     | NS<br>0%, 0.380                                                          | NS<br>-, -                                                            | NS<br>-, -                                                           | -                                                                     |

CI = confidence interval; NS = Not significant result (determined by confidence interval crossing 1).

**Table S11.** Odds ratios (OR) of outcomes as meta-analysed by route of administration.

|                                    | <b>Overall OR<br/>(CI)<br/><i>I</i><sup>2</sup>, <i>p</i> Value</b> | <b>Subcutaneous OR<br/>(CI)<br/><i>I</i><sup>2</sup>, <i>p</i> Value</b> | <b>Intravenous OR<br/>(CI)<br/><i>I</i><sup>2</sup>, <i>p</i> Value</b> | <b>Inhaled OR<br/>(CI)<br/><i>I</i><sup>2</sup>, <i>p</i> Value</b> | <b>Oral OR<br/>(CI)<br/><i>I</i><sup>2</sup>, <i>p</i> Value</b> |
|------------------------------------|---------------------------------------------------------------------|--------------------------------------------------------------------------|-------------------------------------------------------------------------|---------------------------------------------------------------------|------------------------------------------------------------------|
| Discontinuation from adverse event | NS<br>61%, 0.009                                                    | NS<br>89%, <0.001                                                        | NS<br>-, -                                                              | NS<br>0%, 0.703                                                     | <b>2.1</b><br>(1.5, 3.0)<br>0%, 0.743                            |
| Clinical deterioration             | <b>0.4</b><br>(0.2, 0.8)<br>47%, 0.080                              | NS<br>88%, 0.004                                                         | -                                                                       | NS<br>-, -                                                          | <b>0.4</b><br>(0.3, 0.5)<br>0%, 0.485                            |
| Fatalities                         | NS<br>14%, 0.319                                                    | NS<br>-, -                                                               | NS<br>-, -                                                              | NS<br>0%, 0.863                                                     | NS<br>0%, 0.691                                                  |
| Lung transplant                    | NS<br>0%, 0.870                                                     | NS<br>-, -                                                               | -                                                                       | -                                                                   | NS<br>0%, 0.712                                                  |
| Rescue therapy                     | NS<br>0%, 0.695                                                     | NS<br>0%, 0.866                                                          | NS<br>-, -                                                              | NS<br>-, -                                                          | NS<br>0%, 0.448                                                  |
| Right ventricular heart failure    | NS<br>0%, 0.485                                                     | NS<br>-, -                                                               | -                                                                       | NS<br>4%, 0.309                                                     | NS<br>36%, 0.211                                                 |

CI = confidence interval; NS = Not significant result (determined by confidence interval crossing 1).

**Table S12.** Meta-regression for outcomes.

|                               | Meta-Regression | Coefficient | Standard Error | <i>p</i> -Value |
|-------------------------------|-----------------|-------------|----------------|-----------------|
| Clinical deterioration        | Mean age        | 0.0590      | 0.2755         | 0.844           |
|                               | % female        | 0.1150      | 0.2858         | 0.714           |
|                               | % IPAH          | 0.0092      | 0.1605         | 0.958           |
| Adverse event discontinuation | Mean age        | 0.0780      | 0.1065         | 0.491           |
|                               | % female        | -0.0092     | 0.0839         | 0.916           |
|                               | % IPAH          | 0.0897      | 0.0789         | 0.319           |
| Fatalities                    | Mean age        | -0.0649     | 0.0382         | 0.133           |
|                               | % female        | 0.0779      | 0.3455         | 0.064           |
|                               | % IPAH          | 0.0217      | 0.0312         | 0.517           |
| 6MWD (WMD)                    | Mean age        | -0.7538     | 0.6187         | 0.249           |
|                               | % female        | -0.6544     | 0.4702         | 0.191           |
|                               | % IPAH          | 0.0094      | 0.4465         | 0.984           |
| 6MWD (SMD)                    | Mean age        | -0.0045     | 0.0411         | 0.915           |
|                               | % female        | 0.0170      | 0.0323         | 0.609           |
|                               | % IPAH          | 0.0300      | 0.0290         | 0.328           |
| Borg (WMD)                    | Mean age        | 0.1440      | 0.0881         | 0.350           |
|                               | % female        | 0.0729      | 0.0666         | 0.472           |
|                               | % IPAH          | 0.0606      | 0.0577         | 0.485           |
| Borg (SMD)                    | Mean age        | 0.0511      | 0.0266         | 0.306           |
|                               | % female        | 0.6314      | 0.0329         | 0.306           |
|                               | % IPAH          | 0.0368      | 0.0260         | 0.392           |
| Rescue therapy                | Mean age        | 0.1580      | 0.1148         | 0.262           |
|                               | % female        | 0.0084      | 0.1104         | 0.944           |
|                               | % IPAH          | 0.0828      | 0.0680         | 0.310           |

IPAH = idiopathic pulmonary arterial hypertension. 6MWD = six-minute walk distance; WMD = weighted mean difference; SMD = standardised mean difference.

**Table S13.** Eggers and begs values tests detecting publication bias on overall groups.

|                                           | Number of Studies | Eggers | Beggs | Funnel Plot Symmetry |
|-------------------------------------------|-------------------|--------|-------|----------------------|
| 6MWD (WMD)                                | 14                | 0.119  | 0.189 | NSy                  |
| 6MWD (SMD)                                | 14                | 0.250  | 0.584 | NSy                  |
| Borg (WMD)                                | 6                 | 0.914  | 0.707 |                      |
| Borg (SMD)                                | 9                 | 0.716  | 1.000 | Sy                   |
| Mean pulmonary arterial pressure (WMD)    | 7                 | 0.248  | 0.881 | NSy                  |
| Mean pulmonary arterial pressure (SMD)    | 7                 | 0.955  | 0.176 | NSy                  |
| Pulmonary vascular resistance index (WMD) | 4                 | 0.362  | 0.999 | NSy                  |
| Pulmonary vascular resistance index (SMD) | 4                 | 0.897  | 0.497 | NSy                  |
| Mixed venous saturation (WMD)             | 5                 | 0.327  | 0.806 | NSy                  |
| Mixed venous saturation (SMD)             | 5                 | 0.834  | 0.462 | NSy                  |
| Right arterial pressure (WMD)             | 6                 | 0.063  | 0.844 | NSy                  |
| Right arterial pressure (SMD)             | 6                 | 0.879  | 0.260 | NSy                  |
| Cardiac index (WMD)                       | 5                 | 0.395  | 0.462 | NSy                  |
| Cardiac index (SMD)                       | 5                 | 0.527  | 1.000 | NSy                  |
| Heart Rate (WMD)                          | 5                 | 0.262  | 0.086 | NSy                  |
| Heart Rate (SMD)                          | 5                 | 0.126  | 0.462 | NSy                  |
| Clinical deterioration                    | 7                 | 0.727  | 0.368 |                      |
| Fatalities                                | 11                | 0.035  | 0.251 | NSy                  |
| Rescue therapy                            | 8                 | 0.240  | 0.711 |                      |
| Discontinuation due to AE                 | 9                 | 0.457  | 0.466 | Sy                   |

6MWD = six-minute walk distance; WMD = weighted mean difference; SMD = standardised mean difference; AE = adverse event; Sy = symmetrical; NSy = not symmetrical.

## Reference

1. Research Triangle Park, United Therapeutics, MA, U. Remodulin® (treprostinil) Injection, for subcutaneous or intravenous use. Available online: <https://www.remodulin.com/downloads/remodulin-prescribinginformation.pdf> (accessed on 1 November 2015).
2. United Therapeutics Corp. *Tyvaso (treprostinil) prescribing information*; Research triangle park, NC, 2009. Available online: [https://www.accessdata.fda.gov/drugsatfda\\_docs/label/2009/022387LBL.pdf](https://www.accessdata.fda.gov/drugsatfda_docs/label/2009/022387LBL.pdf) (accessed on 1 July 2017)
3. United Therapeutics Corp. *Full prescribing information: Orenitram (TM) Extended release tablets for oral administration*; Research Triangle Park, 2013. Available online: [https://www.accessdata.fda.gov/drugsatfda\\_docs/label/2013/203496s000lbl.pdf](https://www.accessdata.fda.gov/drugsatfda_docs/label/2013/203496s000lbl.pdf) (accessed on 1 July 2017)
4. European Medicines Agency *Upravi (selexipag): Summary of Product characteristics*; London, 2016. Available online: [http://www.ema.europa.eu/docs/en\\_GB/document\\_library/EPAR\\_-\\_Product\\_Information/human/003774/WC500207173.pdf](http://www.ema.europa.eu/docs/en_GB/document_library/EPAR_-_Product_Information/human/003774/WC500207173.pdf) (accessed on 1 July 2017)
5. Beraprost pharmacology Available online: <https://www.drugbank.ca/drugs/DB05229> (accessed on 1 July 2017).
6. European Medicines Agency *Ventavis—Scientific Discussion*; London, 2004. Available online: [http://www.ema.europa.eu/docs/en\\_GB/document\\_library/EPAR\\_-\\_Scientific\\_Discussion/human/000474/WC500048688.pdf](http://www.ema.europa.eu/docs/en_GB/document_library/EPAR_-_Scientific_Discussion/human/000474/WC500048688.pdf) (accessed on 1 July 2017)
